# Supplementary material
Source: PubMed Central journal article supplement (PMC3421661)
Supplement: JVI.00599-12_zjv999096244so1.pdf [file JVI.00599-12_zjv999096244so1.pdf]

| <b>Group ID</b> | <b>Animal #</b> | <b>Body Weight</b> | <b>Trim5 Allele*</b> | <b>Time Infected</b> | <b>Peak viremia (RNA copies/ml)</b> |
|-----------------|-----------------|--------------------|----------------------|----------------------|-------------------------------------|
| <b>Vaccine</b>  | AS72            | 3.85               | RR                   |                      |                                     |
|                 | AZ61            | 5.5                | sR                   |                      |                                     |
|                 | AZ74            | 5.14               | ss                   | Week 18              | 5080320                             |
|                 | AV53            | 4.29               | RR                   |                      |                                     |
|                 | BC49            | 6.06               | sR                   |                      |                                     |
|                 | DCA3            | 4.27               | sR                   | Week 22              | 2669351                             |
|                 | T4232           | 5.14               | RR                   |                      |                                     |
|                 | 7-42            | 4.95               | sR                   | Week 17              | 9012954                             |
|                 | 7-104           | 4.31               | sR                   |                      |                                     |
|                 | 7-152           | 5.16               | sR                   |                      |                                     |
| <b>Null</b>     | AZ04            | 4.85               | sR                   | Week 17              | 1251927                             |
|                 | AZ41            | 4.86               | sR                   | Week 22              | 3872290                             |
|                 | AZ60            | 4.08               | sR                   | Week 15              | 49553554                            |
|                 | AZ80            | 4.74               | ss                   | Week 19              | 229126334                           |
|                 | AZ87            | 4.11               | sR                   | Week 15              | 62656944                            |
|                 | AV12            | 5.81               | sR                   |                      |                                     |
|                 | DCJ4            | 4.3                | ss                   | Week 16              | 2569070                             |
|                 | T4244           | 5.16               | RR                   | Week 16              | 1327513                             |
|                 | 7-26            | 4,74               | sR                   | Week 15              | 28614920                            |
|                 | 7-60            | 4.88               | sR                   |                      |                                     |

\*: Trim5 alleles were typed based on the sequences in the SPRY region, R: restrict allele 1-5: Trim5<sup>TFP</sup>; s: sensitive allele 6-11: Trim5<sup>Q</sup>.

**Table S1.** Monkeys and SIV infection status.

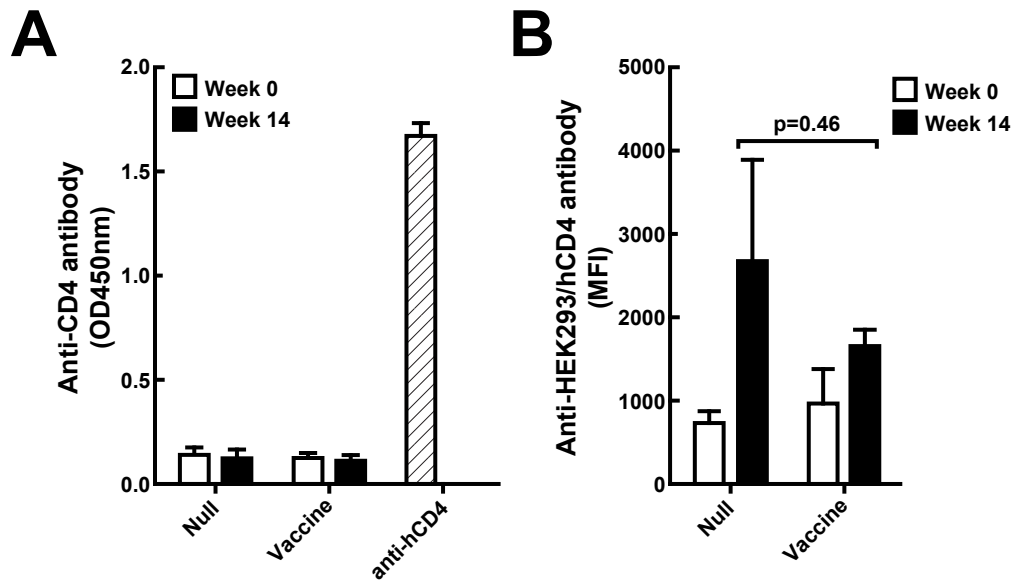

**Fig. S1.** Anti-CD4 antibodies were not detected in vaccinated monkeys. (A) Purified human CD4 protein was used to coat ELISA plates and anti-CD4 IgG in monkey sera (1:50 dilution) from monkeys in the null or vaccine group at pre-vaccination (Week 0) and post-vaccination (Week 14) were determined. (B) HEK 293 cells transfected with plasmid encoding human CD4 were stained with monkey sera and detected with PE-labeled anti-monkey IgG antibodies. There is no significant difference between null and vaccine monkeys at Week 0 or Week 14 ( $p > 0.05$ ).
